# Supplementary material for: International Spinal Cord Injury Vocational Rehabilitation Basic Data Set
Source: Research Square preprint supplement (doi:10.21203/rs.3.rs-8114000/v1), 2025-12-11
Supplement: Supplementary file 1 [file 69d971ddc033ff100e2efc6b.docx]

**International Spinal Cord Injury**

**Vocational Rehabilitation Basic Data Set (Version 1.0)**

James Middleton, Australia

Gillean Hilton, Australia

Reuben Escorpizo, USA

Annelie Leiulfsrud, Norway

Conran Joseph, South Africa

Lisa Ottomanelli, USA

Ellen Roels, the Netherlands

Mohammad Mosayed Ullah, Australia

Corresponding committee member:

James Krause, USA

Acknowledgement:

Marcel Post, the Netherlands

Edelle Field-Fote, USA

Stephen Burns, USA

Fin Biering-Soerensen, Denmark

The International Spinal Cord Injury (SCI) Vocational Rehabilitation Basic Data Set was produced under the umbrella of the International Spinal Cord Society (ISCoS).

Each variable, and the response category within each variable, has been defined and designed to facilitate the collection of a uniform basic data set.

**Introduction**

Employment refers to any activity to produce goods or provide services for pay or profit, whereas the term work relates to any activity performed to produce goods or to provide services for use by others or for own use (International Labour Organization, (ILO) 2023). Employment (for pay) and work can be affected in the case of spinal cord injury / spinal cord dysfunction (SCI/D). Employment is a key dimension of participation that impacts health and well-being. Benefits of work participation include the promotion of productivity and contribution to society while supporting a sense of self-identity, status, and social recognition. Participation in work and employment contributes to economic self-sufficiency and can improve health and quality of life. The concept of ‘work participation’ is central to both employment and work.

**Definitions**

The following definitions apply where used within the data set.

***Employment***

- Any activity to produce goods or provide services for pay or profit for people of working age (15 years or older). They can be persons “at work (work for at least one hour within a given week)” and “not at work” due to temporary absence from a job (ILO, 2023)

***Work***

- Any activity performed by persons of any sex and age to produce goods or to provide services for use by others or for own use (ILO, 2023).

***Job***

- Defined in ISCO-08 as “a set of tasks and duties performed, or meant to be performed, by one person, including for an employer or in self employment”.

***Occupation***

- Refers to the kind of work performed in a job. The concept of *occupation*is defined as a “set of jobs whose main tasks and duties are characterized by a high degree of similarity”.  A person may be associated with an occupation through the main job currently held, a second job, a future job or a job previously held. Detailed definitions for the 10 classifications of occupation are listed at

<https://ilostat.ilo.org/methods/concepts-and-definitions/classification-occupation/>

***Work participation***

- Major life area which includes paid or unpaid employment (International Classification of Functioning, Disability and Health, ICF).
- Central concept to both employment and work.

***Work functioning***

- A person’s capacity and ability to engage in work or employment; can be influenced by personal factors and the environment (Escorpizo, et al, 2011).

***Vocational rehabilitation***

- A conceptual definition of vocational rehabilitation based on the ICF framework is a multi-professional evidence-based approach that is provided in different settings, services, and activities to working-age individuals with health-related impairments, limitations, or restrictions with work functioning, and whose primary aim is to optimize work participation. (Escorpizo, et al, 2011)
- We acknowledge that in practice vocational rehabilitation approaches can vary based on context, setting and resources.

**Purpose of data set**

The purpose of the data set is to support *basic* data collection related to the provision of vocational rehabilitation in a uniform and consistent way internationally. This data can be collected in addition to the Sociodemographic Basic Data Set (Chen, et al, 2023) items of ‘Years of formal education’ and ‘Primary occupation’, and the Activity and Participation Data Set (Post, et al, 2016) items of ‘Rating of performance (hours)’ and ‘Satisfaction in paid work, unpaid work and volunteer work’. The intent of the questions in the vocational rehabilitation data set is to understand the level of education achieved by a person (as this is a known predictor of employment outcome Krause et al, 2012) and to gain further detail around a person’s employment experience pre and post onset of SCI in order to guide future implementation of vocational rehabilitation.

As defined above, vocational rehabilitation following spinal cord injury or dysfunction aims to optimize work participation. The purpose of vocational rehabilitation includes:

- Returning to and remaining in the previous employment
- Obtaining and maintaining new employment

Therefore, variables within this data set focus specifically on ‘employment’, as opposed to ‘work’.

This data set can be used in various settings, and at multiple time points. In the development of the data set, the clinical settings of hospital acute or subacute admission, or outpatient or community have been considered along with the use of the data set for research purposes across the continuum of care.

Use of the data set may also be considered with younger adults where return to education is part of the vocational rehabilitation pathway.

It is anticipated that different members of the multidisciplinary team, or the person themselves, could complete the data set.

**Summary of recommendations**

The International SCI Vocational Rehabilitation Basic Data Set consists of 9 items:

1. Level of educational attainment pre-injury (10 categories)
2. Pre-injury occupational role / employment status (12 categories)
3. Pre-injury Occupation type (12 categories)
4. Current occupational role / employment status (15 categories)
5. Current occupation type (12 categories)
6. Importance of employment (2 categories)
7. Goal to return to employment within the next year (1 category)
8. Participation in vocational rehabilitation to support return to employment goal (2 categories)
9. Experience of vocational rehabilitation (4 categories)

It is anticipated that this data set is used in conjunction with the International SCI Core Data Set, specifically, complementary data items including:

- Injury date
- Birth date
- Date of acute admission
- Final date of hospital admission
- Sex
- Spinal cord etiology
- Neurological impairment

This information allows the derivation of time relative to employment status post injury.

Appendix 1 contains the data form.

Appendix 2 contains the syllabus, with instructions for all items and definitions.

Appendix 1: Data Collection Form

**International Spinal Cord Injury**

**Vocational Rehabilitation Basic Data Set (Version 1.0)**

Date of data collection: _ _ _/_ _/_ _ (YYYY/MM/DD)

1. Level of educational attainment pre-injury (10 categories)

 Early childhood education (or no schooling)

 Primary education

 Lower secondary education

 Upper secondary education

 Post secondary non-tertiary education

 Short-cycle tertiary education

 Bachelor’s or equivalent level

 Master’s or equivalent level

 Doctoral or equivalent level

 Not elsewhere classified

 Unknown

1. Pre-injury occupational role / employment status (12 categories)

2a.Working for wages or salary with an employer.

 Yes Please record the average number of hours per week ____

 No

﻿2b. Self-employed, working.

 Yes Please record the average number of hours per week ____

 No

2c. Non-paid work such as volunteer

 Yes

 No

2d. Student or in training

 Yes

 No

2e. Homemaker

 Yes

 No

﻿2f. Unemployed (but actively looking for paid employment)

 Yes

 No

﻿2g. Unemployed (not looking for paid employment)

 Yes

 No

﻿ 2h. Unemployed (but actively looking for unpaid/volunteer work)

 Yes

 No

2i. Unemployed (not looking for unpaid/volunteer work

 Yes

 No

﻿2j. Retired for health-related reasons

 Yes

 No

﻿2k. Retired due to age

 Yes

 No

﻿2l. Other, please specify:

 Yes

 No

 Unknown

1. Pre-injury occupation type (12 categories)

 Managers

 Professionals

 Technicians and Associate Professionals

 Clerical Support Workers

 Service and Sales Workers

 Skilled Agricultural, Forestry and Fishery Workers

 Craft and Related Trades Workers

 Plant and Machine Operators and Assemblers

 Elementary Occupations

 Armed Forces Occupations

 Other, please specify:

 Not applicable

 Unknown

1. Current occupational role / employment status (15 categories)

4a. Currently in employment?

 Yes

 No

 Unknown

4b.Working for wages or salary with an employer.

 Yes Please record the average number of hours per week ____

 No

﻿4c. Working for wages with an employer, but currently on paid or unpaid leave.

 Yes Please record the average number of hours per week ____

 No

﻿4d. Self-employed, working.

 Yes Please record the average number of hours per week ____

 No

4e. Self-employed, working, but currently on paid or unpaid leave.

 Yes Please record the average number of hours per week ____

 No

4f. Non-paid work such as volunteer

 Yes

 No

4g. Student or in training

 Yes

 No

4h. Homemaker

 Yes

 No

﻿4i. Unemployed (but actively looking for paid employment)

 Yes

 No

﻿4j. Unemployed (not looking for paid employment)

 Yes

 No

﻿ 4k. Unemployed (but actively looking for unpaid/volunteer work)

 Yes

 No

4l. Unemployed (not looking for unpaid/volunteer work)

 Yes

 No

﻿4m. Retired for health-related reasons

 Yes

 No

﻿4n. Retired due to age

 Yes

 No

﻿4o. Other,

 Yes, please specify:

 No

 Unknown

1. Current occupation type (12 categories)

 Managers

 Professionals

 Technicians and Associate Professionals

 Clerical Support Workers

 Service and Sales Workers

 Skilled Agricultural, Forestry and Fishery Workers

 Craft and Related Trades Workers

 Plant and Machine Operators and Assemblers

 Elementary Occupations

 Armed Forces Occupations

 Other, please specify:

 Not applicable

 Unknown

1. Importance of employment (2 categories)

 Importance of being employed prior to the SCI (from 0 = “not important at all” to 10 = “most important”)

 Unknown

 Importance of being employed today (from 0 = “not important at all” to 10 = “most important”)

 Unknown

1. Goal to return to employment within the next year (1 category)

#  Yes

#  No

 Other, please specify:

 Not applicable – already employed

 Unknown

1. Participation in vocational rehabilitation to support return to employment goal (2 categories)

8a. Currently participating in vocational rehabilitation

#  Yes

#  No

 Not applicable – already employed

 Unknown

8b. If no, participation in vocational rehabilitation in the past

#  Yes

#  No

 Unknown

1. If you have participated in the past, or are currently participating, in vocational rehabilitation, check from below all services relevant to your experience.

9a. Guidance and Counselling - Providing advice and support to help individuals navigate career paths or employment challenges

 Received in past

 Currently receiving

 Never received

9b. Assessment and Evaluation - Evaluating the suitability of individuals, workplaces, or roles for effective employment

 Received in past

 Currently receiving

 Never received

9c. Training and Skill Development - Activities focused on enhancing physical, cognitive, and vocational abilities to prepare individuals for work

 Received in past

 Currently receiving

 Never received

9d. Support and Management - Coordinating resources and support systems to assist individuals in achieving employment goals

 Received in past

 Currently receiving

 Never received

Appendix 2.

VARIABLE NAME: Date of data collection

DESCRIPTION: This variable documents the date of data collection.

CODES: YYYY/MM/DD

COMMENTS: The collection of vocational rehabilitation data may be carried out at any time after the spinal cord injury. The Date of data collection variable is necessary to identify when the data were collected. This variable provides a way to relate the collected data to other data collected on the same individual at various time points.

VARIABLE NAME: Level of educational attainment pre-injury

DESCRIPTION: This variable documents the highest level of education attained prior to the person sustaining SCI/D.

CODES: Level of educational attainment_____

0 Early childhood education (or no schooling)

1 Primary education

2 Lower secondary education

3 Upper secondary education

4 Post secondary non-tertiary education

5 Short-cycle tertiary education

6 Bachelor’s or equivalent level

7 Master’s or equivalent level

8 Doctoral or equivalent level

9 Not elsewhere classified

99 Unknown

Comments: The level of formal education defined in terms of the International Standard Classification of Education (ISCED-2011) (UNESCO, 2012) required for competent performance of the tasks and duties involved; and <http://uis.unesco.org/en/topic/international-standard-classification-education-isced>

Use ‘99 Unknown’ for missing data.

VARIABLE NAME: **Pre-injury occupational role / employment status**

DESCRIPTION: This variable documents whether the person was employed at the time of their SCI/D.

Which of the following statements best describes employment status prior to onset of SCI/D. There could be more than one response. Mark all that apply. For example, a person may have been studying and working for wages at the same time.

CODES:   a Working for wages or salary with an employer.

﻿ 1 Yes Please record average number of hours per week ____

0 No

b Self-employed, working.

1 Yes Please record average number of hours per week ____

0 No

c Non-paid work such as volunteer

1 Yes

0 No

d Student or in training

1 Yes

0 No

e Homemaker

1 Yes

0 No

﻿f Unemployed (but actively looking for paid work)

1 Yes

0 No

﻿ g Unemployed (not looking for paid work)

1 Yes

0 No

﻿ h Unemployed (but actively looking for unpaid/volunteer work)

1 Yes

0 No

i Unemployed (not looking for unpaid/volunteer work)

1 Yes

0 No

﻿j Retired for health-related reasons

1 Yes

0 No

﻿k Retired due to age

1 Yes

0 No

l Other,

1 Yes please specify:

0 No

99 Unknown

COMMENTS: Establish if employed at the time of injury.

Employment is defined as any activity to produce goods or provide services for pay or profit for people of working age. They can be persons “at work (work for at least one hour)” and “not at work” due to temporary absence from a job (ILO, 2023). Include under self-employed family business where person may or may not receive a wage. When recording hours of work in a week, consider average number of hours per week over the last 3-6 months. This also allows capture of fluctuating employment such as if a person is engaged in seasonal work. Where a person was employed as an apprentice use code ‘1’ for ‘a’.

Where a person was unemployed and in receipt of disability benefits (or equivalent) before SCI, the code f, g, h, i or j can be used to best reflect the person’s experience.

Where retired for reasons other than for health-related or due to age, use Other and then please specify.

Use ‘99 Unknown’ for missing data.

# VARIABLE NAME: **Pre-injury occupation type**

DESCRIPTION: This variable documents the occupation for which the person was primarily employed.

CODES: 1 Managers

2 Professionals

3 Technicians and Associate Professionals

4 Clerical Support Workers

5 Service and Sales Workers

6 Skilled Agricultural, Forestry and Fishery Workers

7 Craft and Related Trades Workers

8 Plant and Machine Operators and Assemblers

9 Elementary Occupations

10 Armed Forces Occupations

11 Other, please specify:

98 Not applicable

99 Unknown

COMMENTS: International Standard Classification of Occupations (ISCO) is Classifications used in labour statistics.

“A*job* is defined in ISCO-08 as “a set of tasks and duties performed, or meant to be performed, by one person, including for an employer or in self employment”.

*Occupation*refers to the kind of work performed in a job. The concept of *occupation*is defined as a “set of jobs whose main tasks and duties are characterized by a high degree of similarity”.  A person may be associated with an occupation through the main job currently held, a second job, a future job or a job previously held. Detailed definitions for the 10 classifications of occupation are listed at

<https://ilostat.ilo.org/methods/concepts-and-definitions/classification-occupation/>

Choose ‘98 Not applicable’ where a person has never worked or didn’t work prior to injury. or was not working at the time of injury

Use ‘99 Unknown’ for missing data.

# VARIABLE NAME: **Current occupational role / employment status**

DESCRIPTION: This variable documents current employment status after injury.

CODES: Is the person currently in employment?

# 1 Yes

# 2 No

99 Unknown

Which of the following statements best describes the current occupational role / employment status? There could be more than one response. Mark all that apply. For example, a person may be studying and working for wages at the same time.

CODES: a Working for wages or salary with an employer.

1 Yes Please record average number of hours per week ____

0 No

﻿b Working for wages with an employer, but currently on paid or unpaid leave.

1 Yes Please record average number of hours per week ____

0 No

﻿c Self-employed, working.

1 Yes Please record average number of hours per week ____

0 No

d Self-employed, working, but currently on paid or unpaid leave.

1 Yes Please record average number of hours per week ____

0 No

e Non-paid work such as volunteer

1 Yes

0 No

f Student or in training

1 Yes

0 No

g Homemaker

1 Yes

0 No

﻿ h Unemployed (but actively looking for paid work)

1 Yes

0 No

﻿ i Unemployed (not looking for paid work)

1 Yes

0 No

﻿ j Unemployed (but actively looking for unpaid/volunteer work)

1 Yes

0 No

k Unemployed (not looking for unpaid/volunteer work)

1 Yes

0 No

﻿l Retired for health-related reasons

1 Yes

0 No

﻿m Retired due to age

1 Yes

0 No

n Other,

1 Yes please specify:

0 No

99 Unknown

COMMENTS: Establish if currently employed.

Employment is defined as any activity to produce goods or provide services for pay or profit for people of working age. They can be persons “at work (work for at least one hour)” and “not at work” due to temporary absence from a job (International Labour Organization). Include under self-employed family business where person may or may not receive a wage. When recording hours of work in a week, consider average number of hours per week over the last 3-6 months. This also allows capture of fluctuating employment such as if a person is engaged in seasonal work. Where a person is employed as an apprentice use code ‘1’ for ‘a’.

Question can be asked regardless of context, i.e., whether in rehabilitation or engaged with services later after injury.

Question adapted from *WORQ question 4,* also with additions from <https://insci.network> and expert consensus.

Retirement due to age refers to the respective ‘retirement age’ for the country of residence.

Where retired for reasons other than for health-related or due to age, such as for financial reasons, then use Other and please specify.

Use ‘99 Unknown’ for missing data.

# VARIABLE NAME: **Current occupation type**

DESCRIPTION: This variable documents the occupation for which the person is primarily employed.

CODES: 1 Managers

2 Professionals

3 Technicians and Associate Professionals

4 Clerical Support Workers

5 Service and Sales Workers

6 Skilled Agricultural, Forestry and Fishery Workers

7 Craft and Related Trades Workers

8 Plant and Machine Operators and Assemblers

9 Elementary Occupations

10 Armed Forces Occupations

11 Other, please specify:

98 Not applicable

99 Unknown

COMMENTS: International Standard Classification of Occupations (ISCO) is Classifications used in labour statistics.

A*job* is defined in ISCO-08 as “a set of tasks and duties performed, or meant to be performed, by one person, including for an employer or in self employment”.

*Occupation*refers to the kind of work performed in a job. The concept of *occupation*is defined as a “set of jobs whose main tasks and duties are characterized by a high degree of similarity”.  A person may be associated with an occupation through the main job currently held, a second job, a future job or a job previously held. Detailed definitions for the 10 classifications of occupation are listed at

<https://ilostat.ilo.org/methods/concepts-and-definitions/classification-occupation/>

Choose ‘98 Not applicable’ where a person has never worked or not working at the current time.

Use ‘99 Unknown’ for missing data.

# VARIABLE NAME: **Importance of employment**

DESCRIPTION: This variable documents how important a person perceives employment to be, whether or not they are employed.

On a scale from 1 to 10 where 1 is very low and 10 is very high, how important did you rate being in employment before your injury and today?

CODES: 1-10 Importance of being employed prior to my SCI (1-10)

99 Unknown

1-10 Importance of being employed today (1-10)

99 Unknown

COMMENTS: Statement about importance has been derived from Canadian Occupational Performance Measure.

Use ‘99 Unknown’ for missing data.

# VARIABLE NAME: **Return to employment goal**

DESCRIPTION: This variable documents whether a person has a goal related to return to employment within the next year.

# CODES: 1 Yes

# 2 No

# 3 Other, please specify:

4 Not applicable – already employed

99 Unknown

COMMENTS: Where a person may have ambivalence or conditions around employment in the future such as: “I’ll be able to think about work when I have sorted out where I am living” choose ‘Other, please specify:’

Where a person has a goal related to unpaid work or volunteering, use ‘Other, please specify:’

# VARIABLE NAME: **Participation in vocational rehabilitation**

# DESCRIPTION: This variable documents whether a person is currently participating in vocational rehabilitation or previously participated in vocational rehabilitation, to support a return to employment goal.

Use ‘99 Unknown’ for missing data.

# CODES: 1 Yes

# 2 No

Not applicable – already employed

99 Unknown

If no, participation in vocational rehabilitation in the past

# 1 Yes

# 2 No

99 Unknown

COMMENTS: A conceptual definition of Vocational Rehabilitation based on the ICF framework is a multi-professional evidence-based approach that is provided in different settings, services, and activities to working-age individuals with health-related impairments, limitations, or restrictions with work functioning, and whose primary aim is to optimise work participation (Escorpizo, et al, 2011).

In practice vocational rehabilitation approaches can vary based on context, setting and resources. The intent of this question is to ascertain where a person is receiving any individualised, goal driven support as part of a vocational pathway. This support may be received from different disciplines, including (for example) a vocational counsellor or occupational therapist.

This question precedes an intended ‘extended data set’ that would explore vocational rehabilitation interventions. Answering ‘yes’ would prompt the completion of the extended question set.

# VARIABLE NAME: **Vocational rehabilitation intervention**

DESCRIPTION: This variable documents the vocational rehabilitation intervention a person has received in the past, or is currently receiving, related to a goal of returning to, or obtaining, employment.

CODES a. Guidance and Counselling

2 Received in past

1 Currently receiving

0 Never received

b. Assessment and Evaluation

2 Received in past

1 Currently receiving

0 Never received

c. Training and Skill Development

2 Received in past

1 Currently receiving

0 Never received

d. Support and Management

2 Received in past

1 Currently receiving

0 Never received

COMMENTS: Examples of vocational rehabilitation intervention have been extracted from WORQ and other sources (Ottomanelli & Goetz, 2016)and then undergone a consensus process with expert clinicians.This question aims to gain a high level indication of the types of intervention a person may have experienced in the time since spinal injury onset.

This question precedes an intended ‘extended data set’ that would explore vocational rehabilitation interventions and outcomes in further detail.

Where a person has received vocational rehabilitation in the past and is currently receiving vocational rehabilitation, indicate responses related to the current experience only.

Definitions of the four categories of responses for the vocational rehabilitation intervention are as follows:

*Guidance and Counselling* - Providing advice and support to help individuals navigate career paths or employment challenges such as: vocational counselling including guiding individuals in selecting or adjusting to suitable vocational roles; career counselling including supporting individuals in planning and advancing their careers.

*Assessment and Evaluation* - Evaluating the suitability of individuals, workplaces, or roles for effective employment, such as: workplace assessment and adaptation including analyzing and modifying workplaces to meet individual needs or improve accessibility; work evaluation including assessing an individual’s capabilities and readiness for work; job analysis including breaking down job roles to identify key tasks, skills, and requirements.

*Training and Skill Development* - Activities focused on enhancing physical, cognitive, and vocational abilities to prepare individuals for work such as: physical training including improving physical capacity to meet job demands; cognitive training including developing cognitive skills such as problem-solving, memory, and decision-making; vocational training including equipping individuals with specific job-related skills or technical expertise.

*Support and Management -* Coordinating resources and support systems to assist individuals in achieving employment goals such as: case management including overseeing and organizing services or interventions tailored to an individual's work-related needs; job development and job placement including identifying and designing potential roles and matching qualified individuals to available jobs.

**References**

International Labour Organization. 21st ICLS, Resolution II, ILOSTAT (Oct 2023). https://ilostat.ilo.org/about/standards/icls/icls-documents/#icls21

Escorpizo, R., Reneman, M. F., Ekholm, J., Fritz, J., Krupa, T., Marnetoft, S. U., Maroun, C. E., Guzman, J. R., Suzuki, Y. and Stucki, G. (2011). A conceptual definition of vocational rehabilitation based on the ICF: building a shared global model. Journal of Occupational Rehabilitation. 21(2):126-33.  doi:10.1007/s10926-011-9292-6

Post, M. W., Charlifue, S., Biering-Sørensen, F., Catz, A., Dijkers, M. P., Horsewell, J., ... & Sinnott, K. A. (2016). Development of the international spinal cord injury activities and participation basic data set. Spinal Cord, 54(7), 530-534.

Chen, Y., Charlifue, S., Noonan, V.K. et al. International spinal cord injury socio-demographic basic data set (version 1.0). Spinal Cord 61, 313–316 (2023). https://doi.org/10.1038/s41393-023-00896-0

Krause, J. S., Terza, J. V., Erten, M., Focht, K. L., & Dismuke, C. E. (2012). Prediction of postinjury employment and percentage of time worked after spinal cord injury. Archives of physical medicine and rehabilitation, 93(2), 373-375.

International Labor Organization. (n.d.). International standard classification of occupations (ISCO) <https://ilostat.ilo.org/methods/concepts-and-definitions/classification-occupation/>

UNESCO Institute for Statistics. (2012). International standard classification of education: ISCED 2011 <http://uis.unesco.org/sites/default/files/documents/international-standard-classification-of-education-isced-2011-en.pdf>

Ottomanelli, L., & Goetz, L. L. (2016). Issues and interventions for workforce participation after spinal cord injury. In *Handbook of return to work: From research to practice* (pp. 519-544). Boston, MA: Springer US.
