# Supplementary material for: International Spinal Cord Injury Vocational Rehabilitation Basic Data Set
Source: Research Square preprint supplement (doi:10.21203/rs.3.rs-8114000/v1), 2025-12-11
Supplement: Supplementary file 1 [file f2dedb0333eb2281b761d741.pdf]

[illegible]

|                                                                                                          |   |   |   |  |  |  |  |  |  |  |   |   |   |   |   |  |  |  |
|----------------------------------------------------------------------------------------------------------|---|---|---|--|--|--|--|--|--|--|---|---|---|---|---|--|--|--|
| Communicating<br>- Receiving -<br>Nonverbal<br>Messages                                                  | 1 |   |   |  |  |  |  |  |  |  |   |   |   |   |   |  |  |  |
| Conversation                                                                                             | 1 |   |   |  |  |  |  |  |  |  |   |   |   |   |   |  |  |  |
| Using<br>communication<br>devices and<br>techniques                                                      | 1 | 1 | 1 |  |  |  |  |  |  |  |   |   |   |   |   |  |  |  |
| Changing basic<br>body position                                                                          | 1 | 1 |   |  |  |  |  |  |  |  |   |   | 1 | 1 |   |  |  |  |
| Maintaining<br>body position                                                                             | 1 |   |   |  |  |  |  |  |  |  |   |   |   |   |   |  |  |  |
| Lifting and<br>carrying objects                                                                          | 1 | 1 | 1 |  |  |  |  |  |  |  |   |   |   |   |   |  |  |  |
| Fine hand use                                                                                            | 1 |   |   |  |  |  |  |  |  |  |   |   |   |   |   |  |  |  |
| Hand and arm<br>use                                                                                      | 1 | 1 |   |  |  |  |  |  |  |  |   |   | 1 | 1 |   |  |  |  |
| Walking                                                                                                  | 1 | 1 |   |  |  |  |  |  |  |  |   |   | 1 |   |   |  |  |  |
| Moving Around                                                                                            | 1 | 1 | 1 |  |  |  |  |  |  |  |   |   |   | 1 |   |  |  |  |
| Moving Around<br>Using<br>Equipment                                                                      | 1 | 1 | 1 |  |  |  |  |  |  |  |   |   |   |   | 1 |  |  |  |
| Using<br>transportation                                                                                  | 1 | 1 | 1 |  |  |  |  |  |  |  |   |   |   |   | 1 |  |  |  |
| Driving                                                                                                  | 1 | 1 | 1 |  |  |  |  |  |  |  |   |   |   |   |   |  |  |  |
| Toileting                                                                                                | 1 | 1 | 1 |  |  |  |  |  |  |  | 1 |   | 1 | 1 |   |  |  |  |
| Dressing                                                                                                 | 1 | 1 |   |  |  |  |  |  |  |  |   |   | 1 |   |   |  |  |  |
| Looking after<br>one's health                                                                            | 1 | 1 | 1 |  |  |  |  |  |  |  |   |   |   |   |   |  |  |  |
| Basic<br>interpersonal<br>interactions                                                                   | 1 |   |   |  |  |  |  |  |  |  |   |   |   |   |   |  |  |  |
| Complex<br>interpersonal<br>interactions                                                                 | 1 |   | 1 |  |  |  |  |  |  |  |   |   |   |   |   |  |  |  |
| Informal social<br>relationships                                                                         |   |   | 1 |  |  |  |  |  |  |  |   | 1 |   |   |   |  |  |  |
| Formal<br>relationships                                                                                  | 1 |   |   |  |  |  |  |  |  |  |   |   |   |   |   |  |  |  |
| School<br>education                                                                                      | 1 |   | 1 |  |  |  |  |  |  |  |   |   |   |   |   |  |  |  |
| Vocational<br>training                                                                                   | 1 |   | 1 |  |  |  |  |  |  |  |   |   |   |   |   |  |  |  |
| Higher<br>education                                                                                      | 1 |   | 1 |  |  |  |  |  |  |  |   |   |   |   |   |  |  |  |
| Apprenticeship                                                                                           | 1 |   | 1 |  |  |  |  |  |  |  |   |   |   |   |   |  |  |  |
| Acquiring,<br>Keeping,<br>Terminating a<br>job                                                           | 1 |   | 1 |  |  |  |  |  |  |  |   | 1 |   |   |   |  |  |  |
| Remunerative<br>Employment                                                                               | 1 | 1 | 1 |  |  |  |  |  |  |  |   | 1 |   |   |   |  |  |  |
| Non-<br>remunerative<br>employment                                                                       | 1 |   |   |  |  |  |  |  |  |  |   | 1 |   |   |   |  |  |  |
| Economic Self-<br>Sufficiency                                                                            | 1 | 1 | 1 |  |  |  |  |  |  |  |   |   |   |   |   |  |  |  |
| Drugs                                                                                                    | 1 |   |   |  |  |  |  |  |  |  |   |   |   |   |   |  |  |  |
| Products and<br>technology for<br>personal use in<br>daily living                                        | 1 | 1 | 1 |  |  |  |  |  |  |  |   |   | 1 | 1 |   |  |  |  |
| Products and<br>technology for<br>personal<br>indoor and<br>outdoor<br>mobility and<br>transportation    | 1 | 1 | 1 |  |  |  |  |  |  |  |   |   | 1 | 1 |   |  |  |  |
| Products and<br>technology for<br>communication                                                          | 1 | 1 | 1 |  |  |  |  |  |  |  |   |   |   |   |   |  |  |  |
| Products and<br>technology for<br>education                                                              | 1 | 1 | 1 |  |  |  |  |  |  |  |   |   |   |   |   |  |  |  |
| Products and<br>technology for<br>employment                                                             | 1 | 1 |   |  |  |  |  |  |  |  |   |   |   |   |   |  |  |  |
| Design,<br>construction<br>and building<br>products and<br>technology of<br>buildings for<br>public use  | 1 | 1 | 1 |  |  |  |  |  |  |  |   |   |   |   | 1 |  |  |  |
| Design,<br>construction<br>and building<br>products and<br>technology of<br>buildings for<br>private use | 1 | 1 | 1 |  |  |  |  |  |  |  |   |   |   |   | 1 |  |  |  |
| Products and<br>technology of<br>land<br>development                                                     |   |   | 1 |  |  |  |  |  |  |  |   |   |   |   |   |  |  |  |
| Climate                                                                                                  | 1 |   |   |  |  |  |  |  |  |  |   |   |   |   |   |  |  |  |
| Light                                                                                                    | 1 |   |   |  |  |  |  |  |  |  |   |   |   |   |   |  |  |  |
| Sound                                                                                                    | 1 |   |   |  |  |  |  |  |  |  |   |   |   |   |   |  |  |  |
| Air quality                                                                                              | 1 |   |   |  |  |  |  |  |  |  |   |   |   |   |   |  |  |  |
| Immediate<br>Family                                                                                      | 1 | 1 | 1 |  |  |  |  |  |  |  |   | 1 | 1 | 1 |   |  |  |  |
| Friends                                                                                                  | 1 | 1 | 1 |  |  |  |  |  |  |  |   |   |   |   |   |  |  |  |
| Acquaintances,<br>peers,<br>colleagues,<br>neighbours<br>and<br>community<br>members                     | 1 | 1 | 1 |  |  |  |  |  |  |  |   |   |   |   |   |  |  |  |
| People in<br>Positions of<br>Authority                                                                   | 1 | 1 | 1 |  |  |  |  |  |  |  |   | 1 |   |   |   |  |  |  |
| Personal care<br>providers and<br>personal<br>assistants                                                 | 1 | 1 | 1 |  |  |  |  |  |  |  |   |   | 1 | 1 |   |  |  |  |
| Health<br>Professionals                                                                                  | 1 | 1 | 1 |  |  |  |  |  |  |  |   |   | 1 | 1 |   |  |  |  |

|                                                                         |   |   |   |  |  |  |  |  |  |  |  |  |   |   |   |   |  |  |  |
|-------------------------------------------------------------------------|---|---|---|--|--|--|--|--|--|--|--|--|---|---|---|---|--|--|--|
| Other Professionals                                                     | 1 | 1 | 1 |  |  |  |  |  |  |  |  |  |   |   |   |   |  |  |  |
| Individual attitudes of immediate family members                        |   |   | 1 |  |  |  |  |  |  |  |  |  |   |   |   |   |  |  |  |
| Individual attitudes of extended family members                         |   |   | 1 |  |  |  |  |  |  |  |  |  |   |   |   |   |  |  |  |
| Individual attitude of friends                                          |   |   | 1 |  |  |  |  |  |  |  |  |  |   |   |   |   |  |  |  |
| Individual attitudes of people in positions of authority                | 1 |   |   |  |  |  |  |  |  |  |  |  |   |   |   |   |  |  |  |
| Individual attitudes of health professionals                            | 1 | 1 | 1 |  |  |  |  |  |  |  |  |  |   |   |   |   |  |  |  |
| Individual attitudes of personal care providers and personal assistants |   |   | 1 |  |  |  |  |  |  |  |  |  |   |   |   |   |  |  |  |
| Individual attitudes of health-related professionals                    |   |   | 1 |  |  |  |  |  |  |  |  |  |   |   |   |   |  |  |  |
| Societal Attitudes                                                      | 1 | 1 | 1 |  |  |  |  |  |  |  |  |  |   |   |   |   |  |  |  |
| Social norms, practices and ideologies                                  | 1 |   | 1 |  |  |  |  |  |  |  |  |  |   |   |   |   |  |  |  |
| Utilities services, systems and policies                                |   |   | 1 |  |  |  |  |  |  |  |  |  |   |   |   |   |  |  |  |
| Housing services, systems and policies                                  | 1 | 1 | 1 |  |  |  |  |  |  |  |  |  |   |   |   |   |  |  |  |
| Communication services, systems and policies                            | 1 |   | 1 |  |  |  |  |  |  |  |  |  |   |   |   |   |  |  |  |
| Transportation services, systems and policies                           | 1 | 1 | 1 |  |  |  |  |  |  |  |  |  |   |   |   |   |  |  |  |
| Services, systems and policies for the production of consumer goods     |   |   | 1 |  |  |  |  |  |  |  |  |  |   |   |   |   |  |  |  |
| Legal services, systems and policies                                    | 1 |   | 1 |  |  |  |  |  |  |  |  |  |   |   |   |   |  |  |  |
| Associations and organizational services, systems and policies          | 1 | 1 | 1 |  |  |  |  |  |  |  |  |  |   |   |   |   |  |  |  |
| Economic services, systems and policies                                 | 1 |   |   |  |  |  |  |  |  |  |  |  |   |   |   |   |  |  |  |
| Social security services, systems and policies                          | 1 | 1 | 1 |  |  |  |  |  |  |  |  |  |   |   |   |   |  |  |  |
| Health services, systems and policies                                   | 1 | 1 | 1 |  |  |  |  |  |  |  |  |  | 1 |   | 1 |   |  |  |  |
| Education and training services, systems and policies                   | 1 |   | 1 |  |  |  |  |  |  |  |  |  |   |   |   |   |  |  |  |
| Labour and employment services, systems and policies                    | 1 |   | 1 |  |  |  |  |  |  |  |  |  | 1 |   |   |   |  |  |  |
| Intellectual functions                                                  | 1 |   |   |  |  |  |  |  |  |  |  |  |   |   |   |   |  |  |  |
| Temperament and personality functions                                   | 1 | 1 | 1 |  |  |  |  |  |  |  |  |  |   |   |   |   |  |  |  |
| Energy and drive functions                                              | 1 | 1 | 1 |  |  |  |  |  |  |  |  |  | 1 |   |   |   |  |  |  |
| Sleep functions                                                         | 1 | 1 | 1 |  |  |  |  |  |  |  |  |  |   |   |   |   |  |  |  |
| Attention Functions                                                     | 1 |   |   |  |  |  |  |  |  |  |  |  |   |   |   |   |  |  |  |
| Memory Functions                                                        | 1 |   |   |  |  |  |  |  |  |  |  |  |   |   |   |   |  |  |  |
| Emotional Functions                                                     | 1 | 1 | 1 |  |  |  |  |  |  |  |  |  |   | 1 |   | 1 |  |  |  |
| Thought Functions                                                       | 1 |   |   |  |  |  |  |  |  |  |  |  |   |   |   |   |  |  |  |
| Higher-level cognitive functions                                        | 1 |   |   |  |  |  |  |  |  |  |  |  | 1 |   |   |   |  |  |  |
| Seeing Functions                                                        | 1 |   |   |  |  |  |  |  |  |  |  |  |   |   |   |   |  |  |  |
| Hearing Functions                                                       | 1 |   |   |  |  |  |  |  |  |  |  |  |   |   |   |   |  |  |  |
| Vestibular Functions                                                    | 1 |   |   |  |  |  |  |  |  |  |  |  |   |   |   |   |  |  |  |
| Sensation of Pain                                                       | 1 | 1 |   |  |  |  |  |  |  |  |  |  |   | 1 |   | 1 |  |  |  |
| Exercise tolerance functions                                            | 1 | 1 | 1 |  |  |  |  |  |  |  |  |  | 1 |   |   |   |  |  |  |
| Muscle Power Functions                                                  | 1 | 1 | 1 |  |  |  |  |  |  |  |  |  |   | 1 |   | 1 |  |  |  |

[illegible]

|                                                           |  |   |   |  |  |  |  |  |  |  |  |   |   |   |   |  |  |  |  |  |
|-----------------------------------------------------------|--|---|---|--|--|--|--|--|--|--|--|---|---|---|---|--|--|--|--|--|
| Motor Reflex Functions                                    |  | 1 | 1 |  |  |  |  |  |  |  |  |   |   |   |   |  |  |  |  |  |
| Involuntary movement reaction functions                   |  | 1 |   |  |  |  |  |  |  |  |  |   |   |   |   |  |  |  |  |  |
| Control of voluntary movement functions                   |  | 1 | 1 |  |  |  |  |  |  |  |  |   |   |   |   |  |  |  |  |  |
| Involuntary movement functions                            |  | 1 |   |  |  |  |  |  |  |  |  |   |   |   |   |  |  |  |  |  |
| Gait pattern functions                                    |  | 1 | 1 |  |  |  |  |  |  |  |  |   |   |   |   |  |  |  |  |  |
| Sensations related to muscles and movement functions      |  | 1 | 1 |  |  |  |  |  |  |  |  |   |   |   |   |  |  |  |  |  |
| Repair functions of the skin                              |  | 1 | 1 |  |  |  |  |  |  |  |  |   |   |   |   |  |  |  |  |  |
| Other functions of the skin                               |  | 1 | 1 |  |  |  |  |  |  |  |  |   |   |   |   |  |  |  |  |  |
| Sensation related to the skin                             |  | 1 | 1 |  |  |  |  |  |  |  |  |   |   |   |   |  |  |  |  |  |
| Lying down                                                |  | 1 | 1 |  |  |  |  |  |  |  |  |   |   |   |   |  |  |  |  |  |
| Sitting                                                   |  | 1 | 1 |  |  |  |  |  |  |  |  |   |   |   |   |  |  |  |  |  |
| Standing                                                  |  | 1 | 1 |  |  |  |  |  |  |  |  |   |   |   |   |  |  |  |  |  |
| Bending                                                   |  | 1 | 1 |  |  |  |  |  |  |  |  |   |   |   |   |  |  |  |  |  |
| Kneeling                                                  |  |   | 1 |  |  |  |  |  |  |  |  |   |   |   |   |  |  |  |  |  |
| Shifting the body's center of gravity                     |  | 1 | 1 |  |  |  |  |  |  |  |  |   |   |   |   |  |  |  |  |  |
| Maintaining a sitting position                            |  | 1 |   |  |  |  |  |  |  |  |  |   |   |   |   |  |  |  |  |  |
| Maintaining a standing position                           |  | 1 |   |  |  |  |  |  |  |  |  |   |   |   |   |  |  |  |  |  |
| Transferring oneself                                      |  | 1 | 1 |  |  |  |  |  |  |  |  |   |   | 1 | 1 |  |  |  |  |  |
| Moving objects with lower extremities                     |  | 1 |   |  |  |  |  |  |  |  |  |   |   | 1 |   |  |  |  |  |  |
| Picking up                                                |  | 1 | 1 |  |  |  |  |  |  |  |  |   |   |   |   |  |  |  |  |  |
| Grasping                                                  |  | 1 | 1 |  |  |  |  |  |  |  |  |   |   |   |   |  |  |  |  |  |
| Manipulating                                              |  | 1 | 1 |  |  |  |  |  |  |  |  |   |   |   |   |  |  |  |  |  |
| Releasing                                                 |  | 1 | 1 |  |  |  |  |  |  |  |  |   |   |   |   |  |  |  |  |  |
| Pulling                                                   |  | 1 | 1 |  |  |  |  |  |  |  |  |   |   |   |   |  |  |  |  |  |
| Pushing                                                   |  | 1 | 1 |  |  |  |  |  |  |  |  |   |   |   |   |  |  |  |  |  |
| Reaching                                                  |  | 1 | 1 |  |  |  |  |  |  |  |  |   |   |   |   |  |  |  |  |  |
| Turning or twisting the hands or arms                     |  | 1 | 1 |  |  |  |  |  |  |  |  |   |   |   |   |  |  |  |  |  |
| Throwing                                                  |  |   | 1 |  |  |  |  |  |  |  |  |   |   |   |   |  |  |  |  |  |
| Catching                                                  |  | 1 |   |  |  |  |  |  |  |  |  |   |   |   |   |  |  |  |  |  |
| Walking short distances                                   |  | 1 | 1 |  |  |  |  |  |  |  |  |   |   |   |   |  |  |  |  |  |
| Walking long distances                                    |  | 1 | 1 |  |  |  |  |  |  |  |  |   |   |   |   |  |  |  |  |  |
| Walking on different surfaces                             |  | 1 | 1 |  |  |  |  |  |  |  |  |   |   |   |   |  |  |  |  |  |
| Walking around obstacles                                  |  | 1 | 1 |  |  |  |  |  |  |  |  |   |   |   |   |  |  |  |  |  |
| Moving around within the home                             |  | 1 | 1 |  |  |  |  |  |  |  |  |   |   |   |   |  |  |  |  |  |
| Moving around within buildings other than the home        |  | 1 | 1 |  |  |  |  |  |  |  |  |   |   |   |   |  |  |  |  |  |
| Washing oneself                                           |  | 1 | 1 |  |  |  |  |  |  |  |  |   | 1 |   |   |  |  |  |  |  |
| Caring for body parts                                     |  | 1 | 1 |  |  |  |  |  |  |  |  |   |   | 1 |   |  |  |  |  |  |
| Regulating urination                                      |  | 1 | 1 |  |  |  |  |  |  |  |  |   |   |   |   |  |  |  |  |  |
| Regulating defecation                                     |  | 1 | 1 |  |  |  |  |  |  |  |  |   |   |   |   |  |  |  |  |  |
| Menstrual care                                            |  | 1 | 1 |  |  |  |  |  |  |  |  |   |   |   |   |  |  |  |  |  |
| Eating                                                    |  | 1 | 1 |  |  |  |  |  |  |  |  |   | 1 | 1 |   |  |  |  |  |  |
| Drinking                                                  |  | 1 | 1 |  |  |  |  |  |  |  |  |   | 1 |   |   |  |  |  |  |  |
| Acquiring a place to live                                 |  | 1 | 1 |  |  |  |  |  |  |  |  |   |   |   |   |  |  |  |  |  |
| Acquisition of goods and services                         |  | 1 | 1 |  |  |  |  |  |  |  |  |   |   |   |   |  |  |  |  |  |
| Preparing meals                                           |  | 1 | 1 |  |  |  |  |  |  |  |  |   |   |   |   |  |  |  |  |  |
| Doing housework                                           |  | 1 | 1 |  |  |  |  |  |  |  |  |   |   |   |   |  |  |  |  |  |
| Caring for household objects                              |  |   | 1 |  |  |  |  |  |  |  |  |   |   |   |   |  |  |  |  |  |
| Assisting Others                                          |  | 1 | 1 |  |  |  |  |  |  |  |  |   |   |   |   |  |  |  |  |  |
| Family relationships                                      |  | 1 | 1 |  |  |  |  |  |  |  |  | 1 |   |   |   |  |  |  |  |  |
| Intimate relationships                                    |  | 1 | 1 |  |  |  |  |  |  |  |  |   |   |   |   |  |  |  |  |  |
| Recreation and leisure                                    |  | 1 | 1 |  |  |  |  |  |  |  |  |   |   |   |   |  |  |  |  |  |
| Religion and spirituality                                 |  | 1 |   |  |  |  |  |  |  |  |  |   |   |   |   |  |  |  |  |  |
| Products or substances for personal consumption           |  | 1 | 1 |  |  |  |  |  |  |  |  |   |   | 1 |   |  |  |  |  |  |
| Products and technology for culture, recreation and sport |  | 1 |   |  |  |  |  |  |  |  |  |   |   |   |   |  |  |  |  |  |
| Assets                                                    |  | 1 | 1 |  |  |  |  |  |  |  |  |   |   |   |   |  |  |  |  |  |

[illegible]

|                                                    |  |  |  |  |  |  |  |  |  |  |   |   |  |  |  |  |  |  |  |
|----------------------------------------------------|--|--|--|--|--|--|--|--|--|--|---|---|--|--|--|--|--|--|--|
| Penetrating/Blunt Injury                           |  |  |  |  |  |  |  |  |  |  | 1 |   |  |  |  |  |  |  |  |
| Single or Multiple Level Spinal Column Injury(ies) |  |  |  |  |  |  |  |  |  |  | 1 |   |  |  |  |  |  |  |  |
| Spinal Column Injury Number                        |  |  |  |  |  |  |  |  |  |  | 1 |   |  |  |  |  |  |  |  |
| Spinal Column Injury Level                         |  |  |  |  |  |  |  |  |  |  | 1 |   |  |  |  |  |  |  |  |
| Disc and Posterior Ligamentous Complex Injury      |  |  |  |  |  |  |  |  |  |  | 1 |   |  |  |  |  |  |  |  |
| Traumatic Translation                              |  |  |  |  |  |  |  |  |  |  | 1 |   |  |  |  |  |  |  |  |
| Mobility Moderate Distances                        |  |  |  |  |  |  |  |  |  |  |   | 1 |  |  |  |  |  |  |  |
| Dressing Lower Body                                |  |  |  |  |  |  |  |  |  |  |   | 1 |  |  |  |  |  |  |  |
| Feeding                                            |  |  |  |  |  |  |  |  |  |  |   | 1 |  |  |  |  |  |  |  |
| Feeding Satisfaction                               |  |  |  |  |  |  |  |  |  |  |   | 1 |  |  |  |  |  |  |  |
| Toileting                                          |  |  |  |  |  |  |  |  |  |  |   | 1 |  |  |  |  |  |  |  |
| Toileting Satisfaction                             |  |  |  |  |  |  |  |  |  |  |   | 1 |  |  |  |  |  |  |  |
| Paid Work                                          |  |  |  |  |  |  |  |  |  |  |   | 1 |  |  |  |  |  |  |  |
| Paid Work Satisfaction                             |  |  |  |  |  |  |  |  |  |  |   | 1 |  |  |  |  |  |  |  |
| Volunteer Work                                     |  |  |  |  |  |  |  |  |  |  |   | 1 |  |  |  |  |  |  |  |
| Volunteer Work Satisfaction                        |  |  |  |  |  |  |  |  |  |  |   | 1 |  |  |  |  |  |  |  |
| Education                                          |  |  |  |  |  |  |  |  |  |  |   | 1 |  |  |  |  |  |  |  |
| Education Satisfaction                             |  |  |  |  |  |  |  |  |  |  |   | 1 |  |  |  |  |  |  |  |
| Household Work                                     |  |  |  |  |  |  |  |  |  |  |   | 1 |  |  |  |  |  |  |  |
| Household Work Satisfaction                        |  |  |  |  |  |  |  |  |  |  |   | 1 |  |  |  |  |  |  |  |
| Spare Time Activities                              |  |  |  |  |  |  |  |  |  |  |   | 1 |  |  |  |  |  |  |  |
| Spare Time Activity Satisfaction                   |  |  |  |  |  |  |  |  |  |  |   | 1 |  |  |  |  |  |  |  |
| Spousal Relationship                               |  |  |  |  |  |  |  |  |  |  |   | 1 |  |  |  |  |  |  |  |
| Spousal Relationship Satisfaction                  |  |  |  |  |  |  |  |  |  |  |   | 1 |  |  |  |  |  |  |  |
| Family Relationship                                |  |  |  |  |  |  |  |  |  |  |   | 1 |  |  |  |  |  |  |  |
| Family Relationship Satisfaction                   |  |  |  |  |  |  |  |  |  |  |   | 1 |  |  |  |  |  |  |  |
| Friends Relationships                              |  |  |  |  |  |  |  |  |  |  |   | 1 |  |  |  |  |  |  |  |
| Friends Relationship Satisfaction                  |  |  |  |  |  |  |  |  |  |  |   | 1 |  |  |  |  |  |  |  |
